# Supplementary material for: Invasive infection caused by Klebsiella pneumoniae is a disease affecting patients with high comorbidity and associated with high long-term mortality
Source: PubMed Central journal article supplement (PMC5889183; doi:10.1371/journal.pone.0195258), 2018-04-06
Supplement: pone.0195258.s002.pdf [file pone.0195258.s002.pdf]

| <i>Patients factors</i>                           | <i>K. pneumoniae</i> | <i>E. coli</i> | <b>p-value</b>    | <b>Odds ratio</b>       |
|---------------------------------------------------|----------------------|----------------|-------------------|-------------------------|
|                                                   | <b>n=599</b>         | <b>n=599</b>   | <b>univariate</b> | <b>(95% confidence</b>  |
|                                                   | <b>No (%)</b>        | <b>No (%)</b>  | <b>analysis</b>   | <b>interval)</b>        |
| Age, median, years                                | 68                   | 68             |                   | N/A                     |
| Male sex                                          | 348 (58)             | 348 (58)       |                   | N/A                     |
| Charlson index, median                            | 3                    | 2              | <b>&lt;0.001</b>  | N/A                     |
| Charlson index 0-1                                | 85 (14)              | 206 (34)       | N/A               | 1 (ref)                 |
| Charlson index 2-3                                | 288 (48)             | 247 (41)       | <b>&lt;0.001</b>  | <b>3.05 (2.19-4.25)</b> |
| Charlson index 4-5                                | 116 (19)             | 70 (11)        | <b>&lt;0.001</b>  | <b>4.18 (2.78-6.32)</b> |
| Charlson index >5                                 | 110 (18)             | 76 (12)        | <b>&lt;0.001</b>  | <b>3.82 (2.51-5.81)</b> |
| Diabetes <sup>a)</sup>                            | 116 (19)             | 99 (17)        | 0.21              | 1.21 (0.90-1.62)        |
| Heart disease <sup>b)</sup>                       | 118 (20)             | 113 (19)       | 0.70              | 1.06 (0.78-1.45)        |
| Previous AMI                                      | 41 (7)               | 40 (7)         | 0.91              | 1.03 (0.65-1.63)        |
| Angina pectoris                                   | 30 (5)               | 31 (5)         | 0.90              | 0.97 (0.58-1.62)        |
| Congestive heart failure                          | 55 (9)               | 58 (10)        | 0.76              | 0.94 (0.63-1.40)        |
| Arrhythmia                                        | 55 (9)               | 58 (10)        | 0.05              | 0.69 (0.47-1.00)        |
| Peripheral vascular disease                       | 30 (5)               | 14 (2)         | <b>0.01</b>       | <b>2.33 (1.19-4.59)</b> |
| Hypertension                                      | 123 (21)             | 144 (24)       | 0.14              | 0.81 (0.62-1.07)        |
| Lung disease <sup>c)</sup>                        | 112 (19)             | 93 (16)        | 0.28              | 1.03 (0.98-1.09)        |
| COPD                                              | 58 (10)              | 37 (6)         | <b>0.03</b>       | <b>1.64 (1.05-2.57)</b> |
| Asthma                                            | 20 (3)               | 16 (3)         | 0.51              | 1.25 (0.65-2.41)        |
| Pleural effusion                                  | 3 (1)                | 6 (1)          | 0.33              | 0.50 (0.13-2.00)        |
| Kidney disease <sup>d)</sup>                      | 105 (18)             | 69 (12)        | <b>0.003</b>      | <b>1.64 (1.18-2.29)</b> |
| Decreased kidney function<br>(moderate to severe) | 83 (14)              | 67 (11)        | 0.17              | 1.28 (0.90-1.80)        |
| Polycystic kidneys                                | 11 (2)               | 8 (1)          | 0.49              | 1.38 (0.55-3.42)        |
| Diabetic nephropathy                              | 9 (2)                | 10 (2)         | 0.82              | 0.90 (0.37-2.21)        |
| Liver disease (mild)                              | 9 (2)                | 11 (2)         | 0.66              | 0.82 (0.34-1.97)        |
| Liver disease (moderate-severe)                   | 43 (7)               | 29 (5)         | 0.07              | 1.64 (0.96-2.78)        |
| Bile disease                                      | 36 (6)               | 15 (3)         | <b>0.003</b>      | <b>2.75 (1.42-5.32)</b> |
| CNS-disease <sup>e)</sup>                         | 129 (22)             | 118 (20)       | 0.42              | 1.13 (0.84-1.50)        |
| Cerebrovascular disease, no<br>sequela            | 30 (5)               | 30 (5)         | 1.00              | 1.00 (0.59-1.69)        |
| Cerebrovascular disease, sequela                  | 45 (9)               | 29 (5)         | 0.06              | 1.57 (0.98-2.52)        |
| Parkinson                                         | 5 (1)                | 8 (1)          | 0.37              | 0.57 (0.17-1.95)        |
| MS                                                | 6 (1)                | 6 (1)          | 1.00              | 1.00 (0.32-3.10)        |
| Dementia                                          | 34 (6)               | 32 (5)         | 0.80              | 1.07 (0.64-1.77)        |
| Epilepsy                                          | 5 (1)                | 9 (2)          | 0.29              | 0.56 (0.19-1.66)        |
| Other CNS-disease <sup>f)</sup>                   | 18 (3)               | 25 (4)         | 0.29              | 0.72 (0.39-1.32)        |

|                                         |          |          |                    |                         |
|-----------------------------------------|----------|----------|--------------------|-------------------------|
| Crohn's disease/ulcerative colitis      | 15 (3)   | 10 (2)   | 0.32               | 1.50 (0.67-3.34)        |
| Diverticulosis/-itis                    | 12 (2)   | 14 (2)   | 0.67               | 0.83 (0.36-1.93)        |
| GVH-reaction intestine                  | 8 (1)    | 0 (0)    | <b>0.01**</b>      | N/A                     |
| Intestinal disease <sup>e)</sup>        | 65 (11)  | 47 (8)   | 0.06               | 1.49 (0.98-2.26)        |
| Rheumatic disease <sup>h)</sup>         | 12 (2)   | 17 (3)   | 0.92               | 1.02 (0.70-1.48)        |
| Gastric ulcer                           | 5 (1)    | 7 (1)    | 0.57               | 0.71 (0.23-2.25)        |
| Malignancy, all*                        | 318 (53) | 226 (38) | <b>&lt;0.001</b>   | <b>2.07 (1.60-2.67)</b> |
| Hematological                           | 112 (19) | 76 (13)  | <b>0.005</b>       | <b>1.58 (1.15-2.17)</b> |
| Urogenital                              | 76 (13)  | 67 (11)  | 0.38               | 1.19 (0.81-1.76)        |
| Colorectal                              | 42 (7)   | 24 (4)   | <b>0.013</b>       | <b>1.95 (1.15-3.30)</b> |
| Pulmonary                               | 15 (3)   | 19 (3)   | 0.48               | 0.78 (0.39-1.56)        |
| Bile/liver/pancreas                     | 51 (9)   | 22 (4)   | <b>&lt;0.001</b>   | <b>2.71 (1.55-4.72)</b> |
| Breast                                  | 12 (2)   | 5 (1)    | 0.10               | 2.40 (0.85-6.81)        |
| Ventricle/esophagus                     | 2 (0)    | 5 (1)    | 0.27               | 0.40 (0.0-2.06)         |
| Melanoma                                | 5 (1)    | 0 (0)    | <b>0.007**</b>     | N/A                     |
| Miscellaneous                           | 12 (2)   | 15 (3)   | 0.70               | 0.86 (0.40-1.85)        |
| Metastasized                            | 92 (15)  | 65 (11)  | <b>0.02</b>        | <b>1.55 (1.08-2.22)</b> |
| Previous organ transplant <sup>i)</sup> | 51 (9)   | 46 (8)   | 0.43               | 1.19 (0.77-1.86)        |
| Neutropenia                             | 81 (14)  | 64 (11)  | 0.12 <sup>a)</sup> | 1.33 (0.93-1.92)        |
| Community-acquired infection            | 258 (43) | 347 (58) | <b>&lt;0.001</b>   | <b>0.55 (0.44-0.70)</b> |
| Healthcare-associated infection         | 163 (27) | 55 (9)   | <b>&lt;0.001</b>   | <b>3.57 (2.54-5.03)</b> |
| Hospital-acquired infection             | 178 (30) | 197 (33) | 0.24               | 0.87 (0.68-1.10)        |
| Urinary catheter <sup>j)</sup>          | 191 (32) | 111 (19) | <b>&lt;0.001</b>   | <b>2.19 (1.64-2.93)</b> |
| Central catheter <sup>k)</sup>          | 190 (32) | 96 (16)  | <b>&lt;0.001</b>   | <b>2.47 (1.85-3.30)</b> |
| Ileostomy                               | 28 (5)   | 13 (2)   | <b>0.02</b>        | <b>2.25 (1.14-4.44)</b> |
| Surgery within 30 d                     | 76 (13)  | 81 (14)  | 0.65               | 0.92 (0.65-1.31)        |
| Dialysis (HD, PD)                       | 22 (4)   | 10 (2)   | <b>0.033</b>       | <b>2.33 (1.07-5.09)</b> |
| Hemodialysis                            | 20 (3)   | 9 (2)    | <b>0.040</b>       | <b>2.38 (1.04-5.43)</b> |
| At ICU when onset of sepsis             | 24 (4)   | 6 (1)    | <b>0.002</b>       | <b>4.00 (1.64-9.79)</b> |
| <i>Source of infection</i>              |          |          |                    |                         |
| Urinary tract                           | 236 (39) | 385 (64) | <b>&lt;0.001</b>   | <b>0.35 (0.27-0.45)</b> |
| Respiratory tract                       | 25 (4)   | 17 (3)   | 0.20               | 1.53 (0.80-2.94)        |
| Bile/liver                              | 89 (15)  | 46 (8)   | <b>&lt;0.001</b>   | <b>2.23 (1.50-3.32)</b> |
| Gastrointestinal tract                  | 57 (10)  | 52 (9)   | 0.62               | 1.10 (0.75-1.63)        |
| CNS                                     | 11 (2)   | 0 (0)    | <b>0.003**</b>     | N/A                     |
| Miscellaneous                           | 16 (3)   | 8 (1)    | 0.11               | 2.00 (0.86-4.67)        |
| Site unknown                            | 165 (28) | 92 (15)  | <b>&lt;0.001</b>   | <b>2.14 (1.59-2.87)</b> |
| <i>Polymicrobial infection</i>          | 89 (15)  | 66 (11)  | <b>0.047</b>       | <b>1.42 (1.00-2.00)</b> |
| <i>E. coli</i>                          | -        | -        |                    |                         |

|                              |        |        |      |                  |
|------------------------------|--------|--------|------|------------------|
| <i>Viridans streptococci</i> | 11 (2) | 13 (2) | 0.67 | 0.83 (0.36-1.93) |
| <i>S. aureus</i>             | 11 (2) | 7 (1)  | 0.35 | 1.57 (0.61-4.05) |
| <i>Enterococcus faecium</i>  | 8 (1)  | 7 (1)  | 1.00 | 1.00 (0.35-2.85) |
| <i>Enterococcus faecalis</i> | 12 (2) | 9 (2)  | 0.49 | 1.38 (0.55-3.42) |

Bold = P<0.05

\*sum will be exceeded when summing individual malignancies due to some patients having more than one type of cancer

\*\*using McNemar test

<sup>a)</sup>insulin and/or tablet treated

<sup>b)</sup>previous AMI, aortic aneurysm >6 cm, congestive heart failure

<sup>c)</sup>COPD, asthma, cancer, pleural effusion

<sup>d)</sup>tumor, hydronephrosis, decreased function

<sup>e)</sup>cerebrovascular disease, dementia

<sup>f)</sup>polio, myasthenia gravis, lymphoma, previous brain surgery

<sup>g)</sup>ulcerative colitis, Crohn's disease, op-ileostomy, intestinal co-infection

<sup>h)</sup>RA, SLE, vasculitis

<sup>i)</sup>kidney, liver, bone marrow, heart

<sup>j)</sup>indwelling urinary catheter, suprapubic catheter, bricker bladder, urinary ileostomy. Intermittent catheterization not included

<sup>k)</sup>central venous catheter, central venous port, intrathecal catheter

---
