# Supplementary material for: Invasive infection caused by Klebsiella pneumoniae is a disease affecting patients with high comorbidity and associated with high long-term mortality
Source: PubMed Central journal article supplement (PMC5889183; doi:10.1371/journal.pone.0195258), 2018-04-06
Supplement: pone.0195258.s003.pdf [file pone.0195258.s003.pdf]

**Mortality within 90 days****Odds Ratio****(95% CI)**

|                                                             |                          |
|-------------------------------------------------------------|--------------------------|
| <i>K. pneumoniae</i> versus <i>E. coli</i>                  | 1.17 (0.85-1.62)         |
| Age                                                         | <b>1.03 (1.01-1.04)</b>  |
| Sex                                                         | 0.94 (0.68-1.30)         |
| Polymicrobial infection                                     | <b>1.55 (1.03-2.34)</b>  |
| Cardiovascular disease                                      | 1.27 (0.86-1.88)         |
| Lung disease                                                | <b>2.02 (1.38-2.97)</b>  |
| Kidney disease                                              | <b>2.05 (1.34-3.16)</b>  |
| CNS disease                                                 | <b>2.66 (1.81-3.91)</b>  |
| Malignancy                                                  | <b>3.18 (2.22-4.53)</b>  |
| <i>Source of infection</i>                                  |                          |
| Urinary tract                                               | 1.0 (ref)                |
| Respiratory tract <sup>a)</sup>                             | <b>6.15 (2.94-12.87)</b> |
| Gastrointestinal,<br>bile/liver/pancreas, CNS <sup>a)</sup> | <b>2.84 (1.90-4.24)</b>  |
| Source unknown <sup>a)</sup>                                | <b>2.53 (1.66-3.87)</b>  |
| Community-acquired<br>infection                             | 1.0 (ref)                |
| Hospital-acquired infection <sup>b)</sup>                   | <b>1.65 (1.13-2.42)</b>  |
| Healthcare-associated<br>community-onset <sup>b)</sup>      | 1.52 (1.00-2.31)         |

Bold = P&lt;0.05

<sup>a)</sup>in relation to source of infection in the urinary tract<sup>b)</sup>in relation to community-acquired infection
