# Supplementary material for: Invasive infection caused by Klebsiella pneumoniae is a disease affecting patients with high comorbidity and associated with high long-term mortality
Source: PubMed Central journal article supplement (PMC5889183; doi:10.1371/journal.pone.0195258), 2018-04-06
Supplement: pone.0195258.s004.pdf [file pone.0195258.s004.pdf]

| <i>Clinical characteristics</i>         | Day 0-7        |                     |                  | Day 0-30        |                     |                  | Day 0-90        |                     |                  |
|-----------------------------------------|----------------|---------------------|------------------|-----------------|---------------------|------------------|-----------------|---------------------|------------------|
|                                         | Dead<br>(n=43) | Survivor<br>(n=609) | p-<br>value      | Dead<br>(n=101) | Survivor<br>(n=551) | p-<br>value      | Dead<br>(n=176) | Survivor<br>(n=476) | p-<br>value      |
| Median age, years                       | 72             | 66                  | 0.15             | 71              | 67                  | <b>0.04</b>      | 70              | 67                  | <b>0.010</b>     |
| Male sex                                | 26 (60)        | 349 (57)            | 0.69             | 52 (51)         | 323 (59)            | 0.18             | 93 (53)         | 282 (59)            | 0.14             |
| Charlson index 0-1                      | 4 (9)          | 91 (15)             | 0.31             | 6 (6)           | 89 (16)             | 0.007            | 10 (6)          | 85 (18)             | <b>&lt;0.001</b> |
| Charlson index 2-3                      | 20 (47)        | 292 (63)            | 0.86             | 45 (45)         | 267 (48)            | 0.47             | 72 (41)         | 240 (57)            | <b>0.03</b>      |
| Charlson index 4-5                      | 6 (14)         | 118 (19)            | 0.38             | 15 (15)         | 109 (20)            | 0.25             | 27 (15)         | 97 (20)             | 0.15             |
| Charlson index >5                       | 13 (30)        | 108 (18)            | <b>0.04</b>      | 35 (35)         | 86 (16)             | <b>&lt;0.001</b> | 67 (38)         | 54 (11)             | <b>&lt;0.001</b> |
| Diabetes <sup>a)</sup>                  | 6 (14)         | 119 (20)            | 0.37             | 14 (14)         | 111 (20)            | 0.14             | 28 (16)         | 97 (20)             | 0.20             |
| Heart disease <sup>b)</sup>             | 11 (26)        | 121 (20)            | <b>0.03</b>      | 28 (28)         | 104 (19)            | <b>0.047</b>     | 45 (26)         | 87 (18)             | <b>0.007</b>     |
| Peripheral vascular disease             | 3 (7)          | 27 (4)              | 0.44             | 4 (4)           | 26 (5)              | 1.00             | 7 (4)           | 23 (5)              | 0.64             |
| Lung disease <sup>c)</sup>              | 15 (35)        | 110 (18)            | <b>0.007</b>     | 32 (32)         | 93 (17)             | <b>0.001</b>     | 46 (26)         | 79 (17)             | <b>0.006</b>     |
| Kidney disease <sup>d)</sup>            | 7 (16)         | 103 (17)            | 0.92             | 17 (17)         | 93 (17)             | 0.99             | 37 (21)         | 73 (15)             | 0.09             |
| Liver disease (mild)                    | 1 (2)          | 8 (1)               | 0.46             | 2 (2)           | 7 (1)               | 0.64             | 4 (2)           | 5 (1)               | 0.26             |
| Liver disease (moderate-severe)         | 4 (9)          | 42 (7)              | 0.53             | 9 (9)           | 37 (7)              | 0.43             | 14 (8)          | 32 (7)              | 0.59             |
| Bile disease                            | 0 (0)          | 40 (7)              | 1.00             | 2 (2)           | 38 (7)              | 0.06             | 8 (5)           | 32 (7)              | 0.30             |
| CNS-disease <sup>e)</sup>               | 10 (23)        | 131 (22)            | 0.79             | 32 (32)         | 109 (20)            | <b>0.008</b>     | 43 (24)         | 98 (21)             | 0.29             |
| Intestinal disease <sup>f)</sup>        | 1 (2)          | 69 (11)             | 0.07             | 8 (8)           | 62 (11)             | 0.32             | 14 (8)          | 56 (12)             | 0.16             |
| Malignancy, all                         | 29 (67)        | 320 (53)            | 0.06             | 68 (67)         | 281 (51)            | <b>0.002</b>     | 120 (68)        | 229 (48)            | <b>&lt;0.001</b> |
| Hematological                           | 11 (26)        | 114 (19)            | 0.27             | 24 (24)         | 101 (18)            | 0.20             | 35 (20)         | 90 (19)             | 0.78             |
| Lung                                    | 6 (14)         | 10 (2)              | <b>&lt;0.001</b> | 8 (8)           | 8 (1)               | <b>0.001</b>     | 12 (7)          | 4 (1)               | <b>&lt;0.001</b> |
| Urogenital                              | 3 (7)          | 75 (12)             | 0.30             | 7 (7)           | 71 (13)             | 0.09             | 20 (11)         | 58 (12)             | 0.77             |
| Ventricle/esophagus                     | 0 (0)          | 3 (0)               | 1.00             | 1 (1)           | 2 (0)               | 0.40             | 2 (1)           | 1 (0)               | 0.18             |
| Bile/liver/pancreas                     | 4 (9)          | 54 (9)              | 0.79             | 13 (13)         | 45 (8)              | 0.13             | 26 (15)         | 32 (7)              | <b>0.001</b>     |
| Colorectal                              | 0 (0)          | 45 (7)              | 0.06             | 4 (4)           | 41 (7)              | 0.21             | 13 (7)          | 32 (7)              | 0.77             |
| Miscellaneous <sup>g)</sup>             | 5 (12)         | 28 (5)              | <b>0.04</b>      | 12 (12)         | 21 (4)              | <b>&lt;0.001</b> | 16 (9)          | 17 (4)              | <b>0.004</b>     |
| Metastasized                            | 11 (26)        | 92 (15)             | 0.07             | 29 (29)         | 74 (13)             | <b>&lt;0.001</b> | 57 (32)         | 46 (10)             | <b>&lt;0.001</b> |
| Previous organ transplant <sup>h)</sup> | 2 (5)          | 54 (9)              | 0.57             | 5 (5)           | 51 (9)              | 0.16             | 12 (7)          | 44 (9)              | 0.33             |
| Neutropenia                             | 9 (21)         | 87 (14)             | 0.24             | 13 (13)         | 83 (15)             | 0.57             | 24 (14)         | 72 (15)             | 0.63             |
| Community-acquired infection            | 19 (44)        | 267 (44)            | 0.97             | 36 (36)         | 250 (45)            | 0.07             | 60 (34)         | 226 (47)            | <b>0.002</b>     |
| Healthcare-associated community-onset   | 8 (19)         | 165 (27)            | 0.22             | 28 (28)         | 145 (26)            | 0.77             | 54 (31)         | 119 (25)            | 0.15             |

|                                      |         |          |                  |         |          |                  |          |          |              |
|--------------------------------------|---------|----------|------------------|---------|----------|------------------|----------|----------|--------------|
| Hospital-acquired infection          | 16 (37) | 177 (29) | 0.26             | 37 (37) | 156 (28) | 0.09             | 62 (35)  | 131 (28) | 0.06         |
| Urinary catheter <sup>b)</sup>       | 14 (33) | 177 (29) | 0.23             | 35 (35) | 156 (28) | 0.07             | 56 (32)  | 135 (28) | 0.21         |
| Central catheter <sup>b)</sup>       | 16 (37) | 190 (31) | 0.41             | 38 (38) | 168 (30) | 0.16             | 63 (36)  | 143 (30) | 0.16         |
| In respirator                        | 2 (5)   | 4 (1)    | 0.05             | 3 (3)   | 3 (1)    | 0.05             | 4 (2)    | 2 (0)    | <b>0.05</b>  |
| Other catheters/stomia               | 2 (5)   | 51 (8)   | 0.76             | 8 (8)   | 45 (8)   | 0.89             | 12 (7)   | 41 (9)   | 0.57         |
| Surgery within 30 d                  | 4 (9)   | 73 (12)  | 0.60             | 9 (9)   | 68 (12)  | 0.33             | 23 (13)  | 54 (11)  | 0.55         |
| Dialysis at onset of BSI             | 2 (5)   | 21 (3)   | 0.66             | 6 (6)   | 17 (3)   | 0.15             | 9 (5)    | 14 (3)   | 0.18         |
| Dialysis due to BSI                  | 2 (5)   | 8 (1)    | 0.14             | 5 (5)   | 5 (1)    | <b>0.01</b>      | 7 (4)    | 3 (1)    | <b>0.005</b> |
| Polymicrobial                        | 18 (42) | 124 (20) | <b>0.001</b>     | 36 (36) | 106 (19) | <b>&lt;0.001</b> | 50 (28)  | 92 (19)  | <b>0.01</b>  |
| <i>Source of infection</i>           |         |          |                  |         |          |                  |          |          |              |
| Urinary tract                        | 12 (28) | 233 (38) | 0.18             | 24 (24) | 221 (40) | <b>0.002</b>     | 48 (27)  | 197 (41) | <b>0.001</b> |
| Respiratory tract                    | 5 (12)  | 21 (3)   | <b>0.02</b>      | 9 (9)   | 17 (3)   | <b>0.01</b>      | 13 (7)   | 13 (3)   | <b>0.007</b> |
| Bile/liver                           | 3 (7)   | 103 (17) | 0.09             | 16 (16) | 90 (16)  | 0.90             | 31 (18)  | 75 (16)  | 0.57         |
| Abdominal                            | 5 (12)  | 60 (10)  | 0.61             | 14 (14) | 51 (9)   | 0.16             | 25 (14)  | 40 (8)   | <b>0.03</b>  |
| Miscellaneous                        | 1 (2)   | 15 (2)   | 1.00             | 2 (2)   | 14 (3)   | 1.00             | 5 (3)    | 11 (2)   | 0.78         |
| CNS                                  | 0 (0)   | 11 (2)   | 1.00             | 1 (1)   | 10 (2)   | 1.00             | 2 (1)    | 9 (2)    | 0.74         |
| Site unknown                         | 17 (40) | 166 (27) | 0.08             | 35 (35) | 148 (27) | 0.11             | 52 (30)  | 131 (28) | 0.61         |
| At ICU at time of sepsis             | 5 (12)  | 20 (3)   | <b>0.02</b>      | 11 (11) | 14 (3)   | <b>&lt;0.001</b> | 14 (8)   | 11 (2)   | <b>0.001</b> |
| To ICU due to sepsis                 | 13 (30) | 54 (9)   | <b>&lt;0.001</b> | 18 (18) | 49 (9)   | <b>0.007</b>     | 24 (14)  | 43 (9)   | 0.09         |
| <i>Time to antibiotic treatment*</i> |         |          |                  |         |          |                  |          |          |              |
| Treatment within 1 h                 | 10 (24) | 104 (17) | 0.28             | 18 (18) | 96 (18)  | 0.89             | 34 (20)  | 80 (17)  | 0.43         |
| Treatment within 2 h                 | 19 (45) | 214 (35) | 0.20             | 39 (39) | 194 (36) | 0.46             | 64 (37)  | 169 (36) | 0.78         |
| Treatment within 4 h                 | 32 (76) | 360 (60) | <b>0.03</b>      | 69 (70) | 323 (59) | <b>0.05</b>      | 113 (65) | 279 (60) | 0.15         |
| Treatment within 12 h                | 36 (86) | 491 (81) | 0.49             | 84 (85) | 443 (81) | 0.38             | 137 (79) | 390 (83) | 0.32         |
| Treatment within 24 h                | 38 (90) | 535 (89) | 0.73             | 89 (90) | 484 (89) | 0.72             | 150 (87) | 423 (90) | 0.30         |
| Treatment within 48 h                | 39 (93) | 589 (98) | 0.06             | 95 (94) | 533 (98) | 0.34             | 166 (96) | 462 (98) | 0.18         |
| More than 48 h **                    | 3 (7)   | 14 (2)   | 0.09             | 4 (4)   | 13 (2)   | 0.31             | 7 (4)    | 10 (2)   | 0.18         |
| <i>Bacterial characteristics</i>     |         |          |                  |         |          |                  |          |          |              |
| ESBL                                 | 2 (5)   | 9 (2)    | 0.16             | 2 (2)   | 9 (2)    | 0.68             | 2 (4)    | 9 (2)    | 0.74         |

Bold = P<0.05

\*calculations based on 645 patients due to missing data in 7 patients

\*\*including patients never receiving antibiotics

<sup>a)</sup>insulin and/or tablet treated

<sup>b)</sup>previous AMI, aortic aneurysm >6 cm, congestive heart failure

<sup>c)</sup>COPD, asthma, cancer, pleural effusion, fibrosis

<sup>d)</sup>tumor, hydronephrosis, decreased function

---

<sup>e)</sup>cerebrovascular disease, dementia

<sup>f)</sup>ulcerative colitis, Crohn's disease, op-ileostomy, intestinal co-infection

<sup>g)</sup>breast, head and neck, skin cancer

<sup>h)</sup>kidney, liver, bone marrow, heart

<sup>i)</sup>indwelling urinary catheter, suprapubic catheter, bricker bladder, urinary ileostomy. Intermittent catheterization not included

<sup>j)</sup>central venous catheter, central venous port, intrathecal catheter

---

2

3
