# Supplementary material for: Invasive infection caused by Klebsiella pneumoniae is a disease affecting patients with high comorbidity and associated with high long-term mortality
Source: PubMed Central journal article supplement (PMC5889183; doi:10.1371/journal.pone.0195258), 2018-04-06
Supplement: pone.0195258.s005.pdf [file pone.0195258.s005.pdf]

| <b>Antibiotic</b>                                                       | <b><i>K. pneumoniae</i><br/>(n=599) (%)</b> | <b><i>E. coli</i><br/>(n=599) (%)</b> | <b><i>K. pneumoniae</i><br/>vs. <i>E. coli</i><br/>P-value</b> | <b><i>E. coli</i><br/>(n=3047)<br/>*</b> | <b>P-value <i>E. coli</i><br/>matched<br/>cohort<br/>versus all <i>E. coli</i></b> |
|-------------------------------------------------------------------------|---------------------------------------------|---------------------------------------|----------------------------------------------------------------|------------------------------------------|------------------------------------------------------------------------------------|
| Ciprofloxacin                                                           | 47 (8)                                      | 103 (17)                              | <b>&lt;0.001</b>                                               | 593 (19)                                 | 0.20                                                                               |
| Trimethoprim/<br>sulfa                                                  | 62 (10)                                     | 172 (29)                              | <b>&lt;0.001</b>                                               | 898 (29)                                 | 0.73                                                                               |
| Cefotaxime                                                              | 11 (2)                                      | 40 (7)                                | <b>&lt;0.001</b>                                               | 208 (7)                                  | 0.90                                                                               |
| Ceftazidime                                                             | 15 (3)                                      | 35 (6)                                | <b>0.004</b>                                                   | 193 (6)                                  | 0.65                                                                               |
| Gentamicin                                                              | 13 (2)                                      | 40 (7)                                | <b>&lt;0.001</b>                                               | 194 (6)                                  | 0.63                                                                               |
| Piperacillin/<br>tazobactam                                             | 35 (6)                                      | 43 (7)                                | 0.35                                                           | 298 (10)                                 | <b>0.046</b>                                                                       |
| Meropenem                                                               | 2 (0)                                       | 0 (0)                                 | 0.50                                                           | 0 (0)                                    | 1.00                                                                               |
| Multidrug-<br>resistance (I or<br>R $\geq$ 3 classes of<br>antibiotics) | 15 (3)                                      | 57 (10)                               | <b>&lt;0.001</b>                                               | 209 (7)                                  | <b>0.022</b>                                                                       |
| ESBL<br>(including CPE)                                                 | 9 (2)                                       | 36 (6)                                | <b>&lt;0.001</b>                                               | 172 (6)                                  | 0.72                                                                               |
| CPE**                                                                   | 1 (0)                                       | 0 (0)                                 | 1.00                                                           | 0 (0)                                    | 1.00                                                                               |
| Isolates with<br>resistance to<br>any group<br>above                    | 106 (18)                                    | 218 (36)                              | <b>&lt;0.001</b>                                               | 1226 (40)                                | 0.08                                                                               |

Bold = P<0.05

\* includes children and one isolate/patient/year

\*\* VIM, CTX-M-1, CMY-2 in genotypic analysis
